# Supplementary material
Source: Springer Nature journal article supplement (https://www.springermedizin.de/resource/supplementary/12881_2011_869_MOESM3_ESM.pdf/9451258)

A

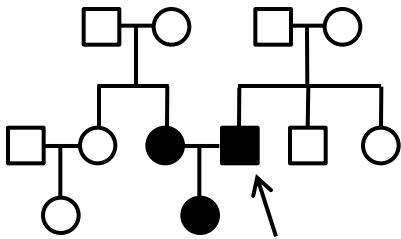

B

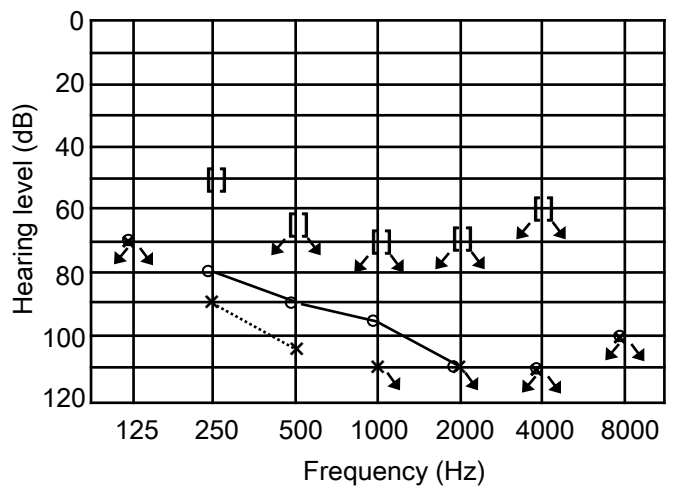

C

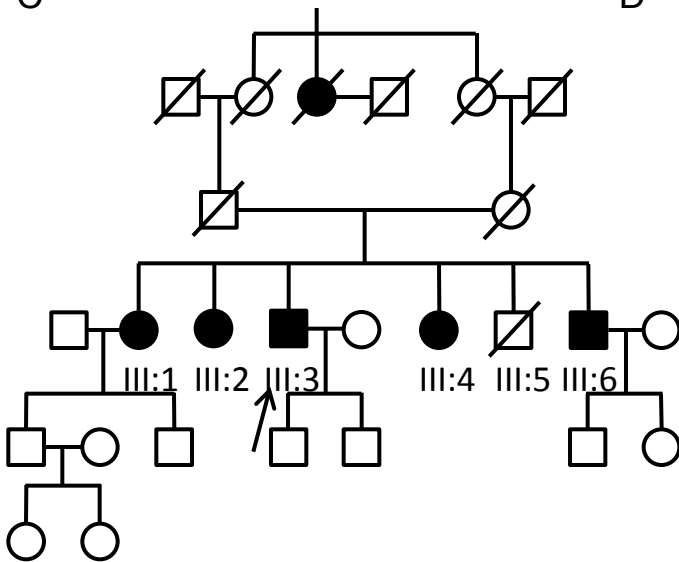

D

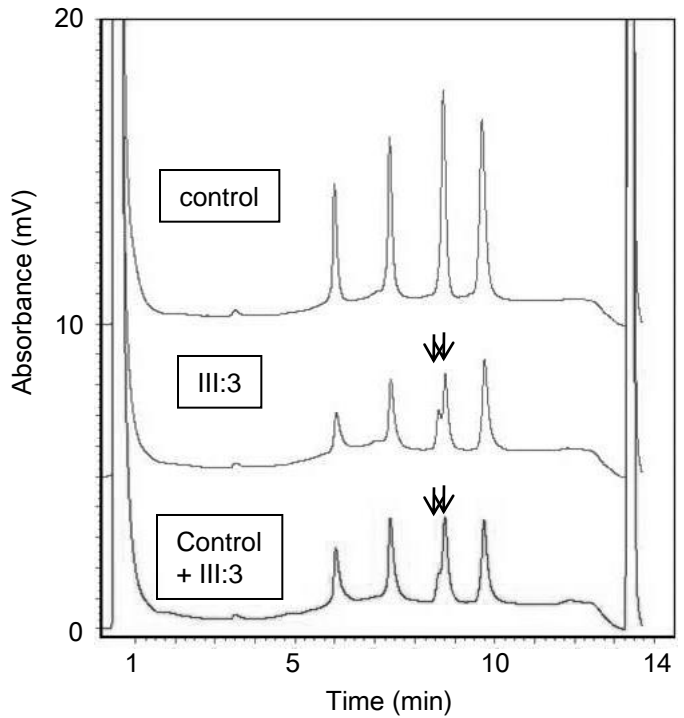

E

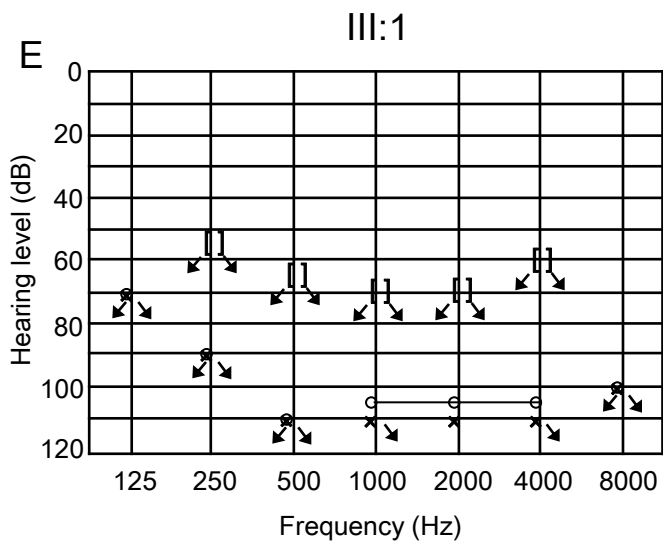

F

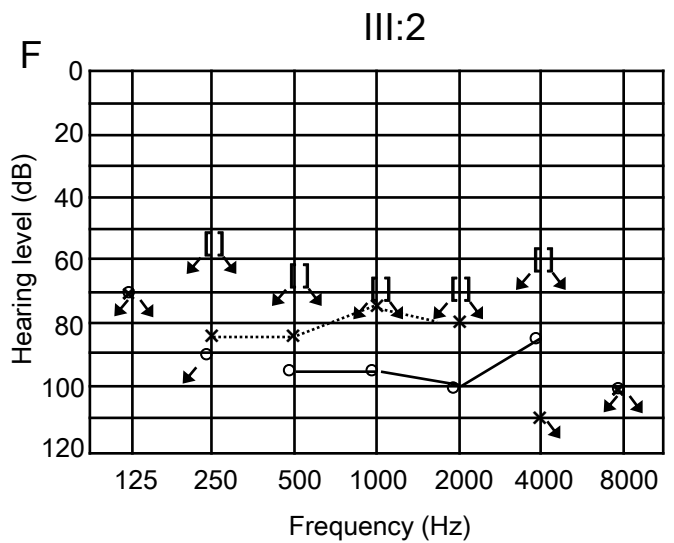

Supplement: MOESM3 [file 9451258]
